# Supplementary material
Source: Springer Nature journal article supplement (https://www.springermedizin.de/resource/supplementary/12936_2011_2083_MOESM2_ESM.pdf/9543368)

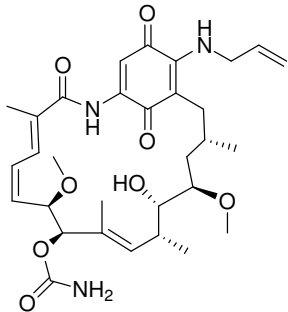

**17-AAG**

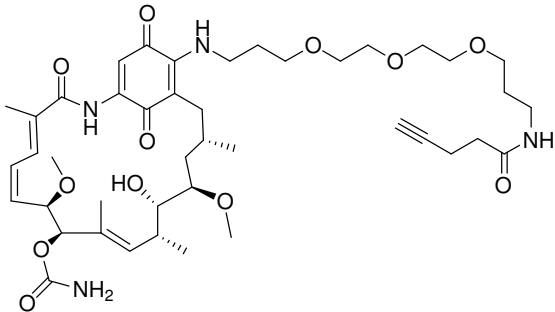

**17-PEG-Alkyn-GA**

Supplement: MOESM2 [file 9543368]
